# Supplementary material for: Immature Dengue Virus: A Veiled Pathogen?
Source: PubMed Central journal article supplement (PMC2798752; doi:10.1371/journal.ppat.1000718), 2010-01-08
Supplement: ppat.1000718.s004.pdf [file ppat.1000718.s004.pdf]

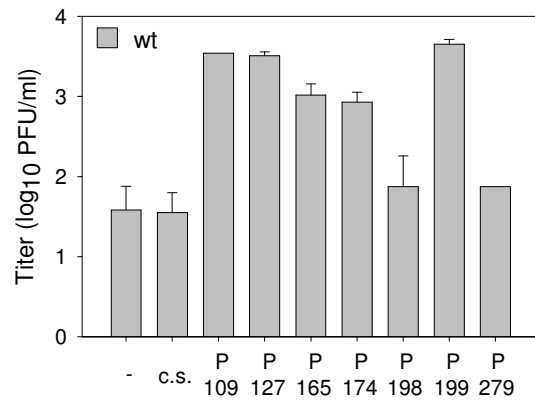

Fig. S4
